# Supplementary material
Source: PubMed Central journal article supplement (PMC7257911)
Supplement: NIHMS1591724-supplement-1.pdf [file NIHMS1591724-supplement-1.pdf]

**Supplemental Information**

**Deamidation Shunts RelA from Mediating**

**Inflammation to Aerobic Glycolysis**

**Jun Zhao, Mao Tian, Shu Zhang, Alireza Delfarah, Ruoyun Gao, Youliang Rao, Ali Can Savas, Anjie Lu, Larissa Bubb, Xiao Lei, Rosa Moshirian, Wenjie Zhu, Cheng Peng, Taijiao Jiang, Lin Chen, Nicholas A. Graham, and Pinghui Feng**

**Supplemental Figures for**

**Title: Deamidation Shunts RelA from Mediating Inflammation to  
Aerobic Glycolysis**

**Authors:** Jun Zhao,<sup>1</sup> Mao Tian,<sup>1</sup> Shu Zhang,<sup>1</sup> Alireza Delfarah,<sup>2</sup> Ruoyun Gao,<sup>1</sup> Youliang Rao,<sup>1</sup> Ali Can Savas,<sup>1</sup> Anjie Lu,<sup>3</sup> Larissa Bubb,<sup>1</sup> Xiao Lei,<sup>4</sup> Rosa Moshirian,<sup>1</sup> Wenjie Zhu,<sup>5</sup> Cheng Peng,<sup>3</sup> Taijiao Jiang,<sup>5</sup> Lin Chen,<sup>4</sup> Nicholas A. Graham,<sup>2</sup> and Pinghui Feng<sup>1,6\*</sup>

**Affiliations:**

<sup>1</sup>Section of Infection and Immunity, Herman Ostrow School of Dentistry, Norris Comprehensive Cancer Center, University of Southern California, 925 W 34<sup>th</sup> Street, Los Angeles, CA 90089, USA;

<sup>2</sup>Mork Family Department of Chemical Engineering and Materials Science, Norris Comprehensive Cancer Center, 3710 McClintock Avenue, Los Angeles, CA 90089, USA;

<sup>3</sup>Department of Orthopedic and Plastic Surgery, The Third Xiangya Hospital of Central South University, Changsha Hunan 410013, China;

<sup>4</sup>Department of Molecular and Computational Biology, 1050 Childs Way, Los Angeles, CA 90089, USA;

<sup>5</sup>Center of Systems Medicine, Institute of Basic Medical Sciences, Chinese Academy of Medical Sciences & Peking Union Medical College, Beijing 100005, China; Suzhou Institute of Systems Medicine, Suzhou 215123, China.

<sup>6</sup>Lead Contact

\*Correspondence: [pinghuif@usc.edu](mailto:pinghuif@usc.edu)

Tel: 213-764-7933

**Figure S1**

**A**

| Name           | Full Name                                        | E.C.     | Function                |
|----------------|--------------------------------------------------|----------|-------------------------|
| CAD            | GATase, CPSase, ATCase and DHOase                | 6.3.5.5  | Pyrimidine Biosynthesis |
| CTPS1<br>CTPS2 | CTP synthase 1<br>CTP synthase 2                 | 6.3.4.2  | Pyrimidine Biosynthesis |
| PFAS           | Phosphoribosylformylglycinamide synthase         | 6.3.5.3  | Purine Biosynthesis     |
| GMPS           | GMP synthase                                     | 6.3.5.2  | Purine Biosynthesis     |
| PPAT           | Amidophosphoribosyltransferase                   | 2.4.2.14 | Purine Biosynthesis     |
| GFPT1<br>GFPT2 | Glutamine--fructose-6-phosphate aminotransferase | 2.6.1.16 | Hexosamine Biosynthesis |
| ASNS           | Asparagine synthetase                            | 6.3.5.4  | AA Biosynthesis         |
| NADSYN1        | Glutamine-dependent NAD(+) synthetase            | 6.3.5.1  | NAD Biosynthesis        |
| CPS1           | Carbamoyl-phosphate synthase 1                   | 6.3.4.16 | Ammonia recycling       |

**B**

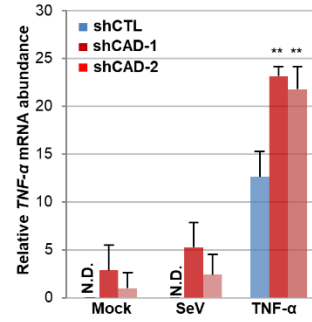

**C**

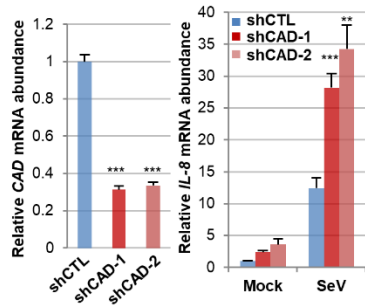

**D**

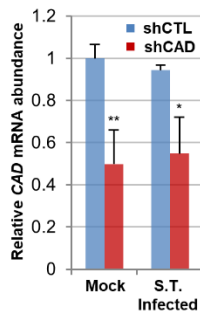

**E**

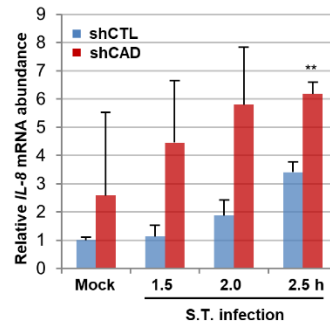

**F**

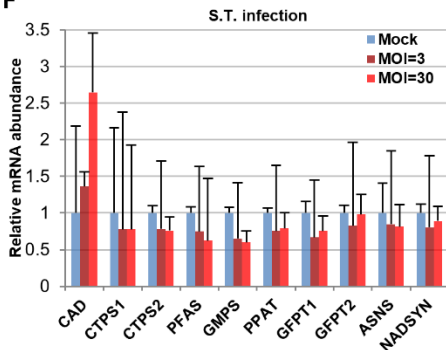

**G**

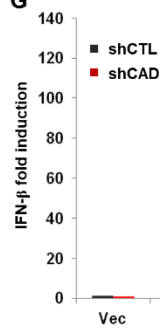

**H**

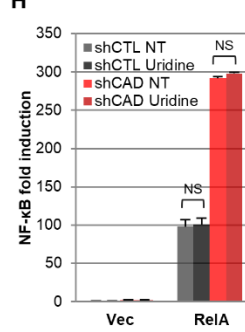

**I**

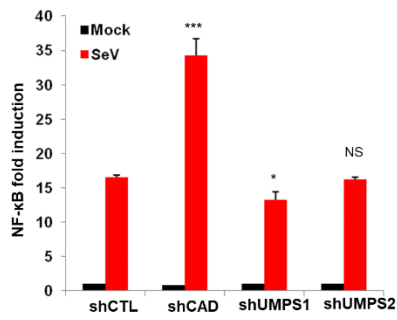

**J**

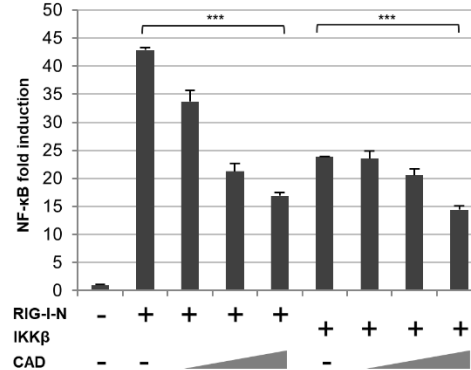

Figure S1, related to Figure 1. CAD Negatively Regulates NF- $\kappa$ B Activation

- (A) The enzyme activity and corresponding metabolic pathway of human GATs.
- (B) *TNF- $\alpha$*  abundance in 293T cells depleted for CAD by two different shRNAs (shCAD-1 and shCAD-2) and after infection with Sendai Virus (SeV) or treatment with *TNF- $\alpha$* .
- (C) *CAD* and *IL-8* abundance in BJ5 cells depleted for CAD by two different shRNAs (shCAD-1 and shCAD-2) and after infection with SeV.
- (D and E) *CAD* (D) and *IL-8* (E) abundance in HCT116 cells depleted for CAD and after infection with *Salmonella Typhimurium* (PhoP<sup>c</sup>).
- (F) The mRNA abundance of indicated GATs in HCT116 cells after infection with *Salmonella Typhimurium* (PhoP<sup>c</sup>).
- (G) IFN- $\beta$  luciferase reporter assay from 293T cells depleted for CAD and transfected with plasmids containing indicated genes.
- (H) NF- $\kappa$ B luciferase reporter assay from 293T cells depleted for CAD, cultured with or without 10  $\mu$ M of uridine, and transfected with a plasmid containing RelA.
- (I) NF- $\kappa$ B luciferase reporter assay from 293T cells depleted for CAD or UMPS and after infection with SeV.
- (J) NF- $\kappa$ B luciferase reporter assay from 293T cells transfected with plasmids containing IKK $\beta$  or RIG-I-N (1-200) with increasing amount of a plasmid containing CAD.

Data are presented as mean  $\pm$  SD. Significance was calculated using unpaired, two-tailed Student's *t*-test. \*\*,  $P < 0.01$ ; \*\*\*,  $P < 0.001$ ; NS, non-significant.

**Figure S2**

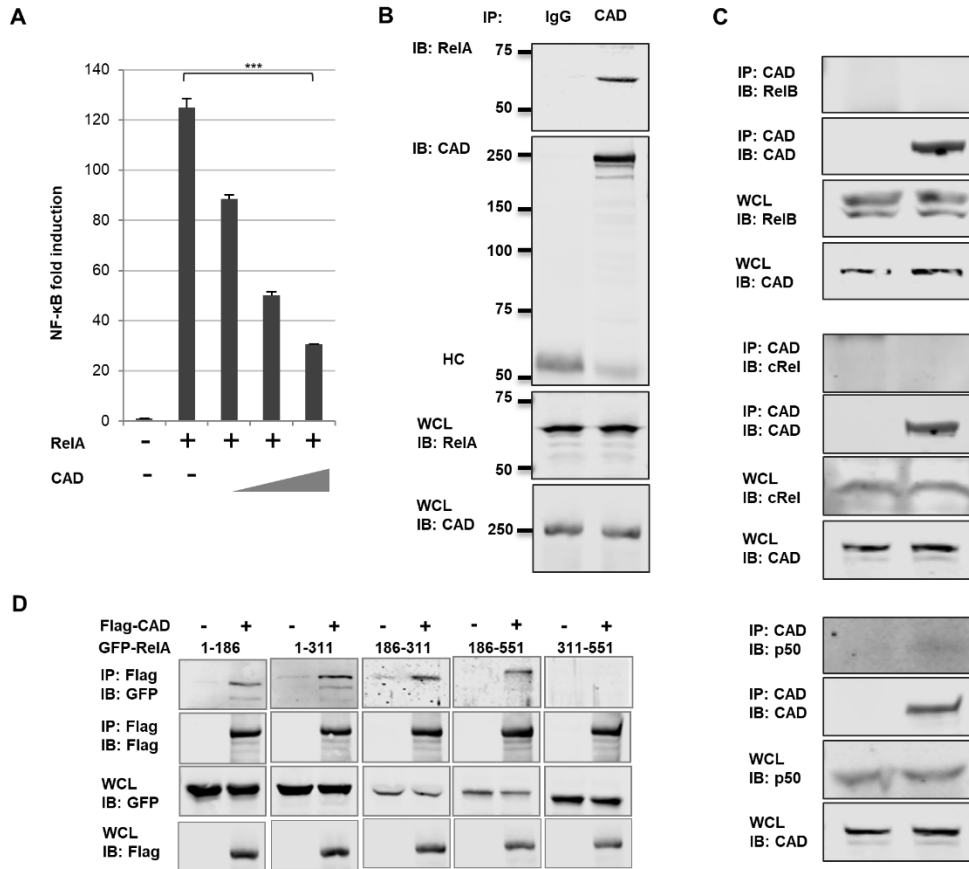

Figure S2, related to Figure 1. CAD Negatively Regulates NF-κB Activation

(A) NF-κB luciferase reporter assay from 293T cells transfected with a plasmid containing RelA and increasing amount of a plasmid containing CAD.

(B) Immunoblots of RelA and CAD from whole cell lysates (WCLs) of 293T cells precipitated with anti-CAD antibody or control (IgG) antibody. HC, heavy chain of IgG.

(C) Immunoblots of CAD, RelB (top), cRel (middle) and p50 (bottom) from WCLs of 293T cells precipitated with anti-CAD antibody or control (IgG) antibody.

(D) Immunoblots of WCLs of 293T cells transfected with plasmids containing the Flag-CAD and GFP-RelA truncation mutants and precipitated with anti-Flag antibody.

Data are presented as mean  $\pm$  SD. Significance was calculated using unpaired, two-tailed Student's *t*-test. \*\*,  $P < 0.01$ ; \*\*\*,  $P < 0.001$ ; NS, non-significant.

**Figure S3**

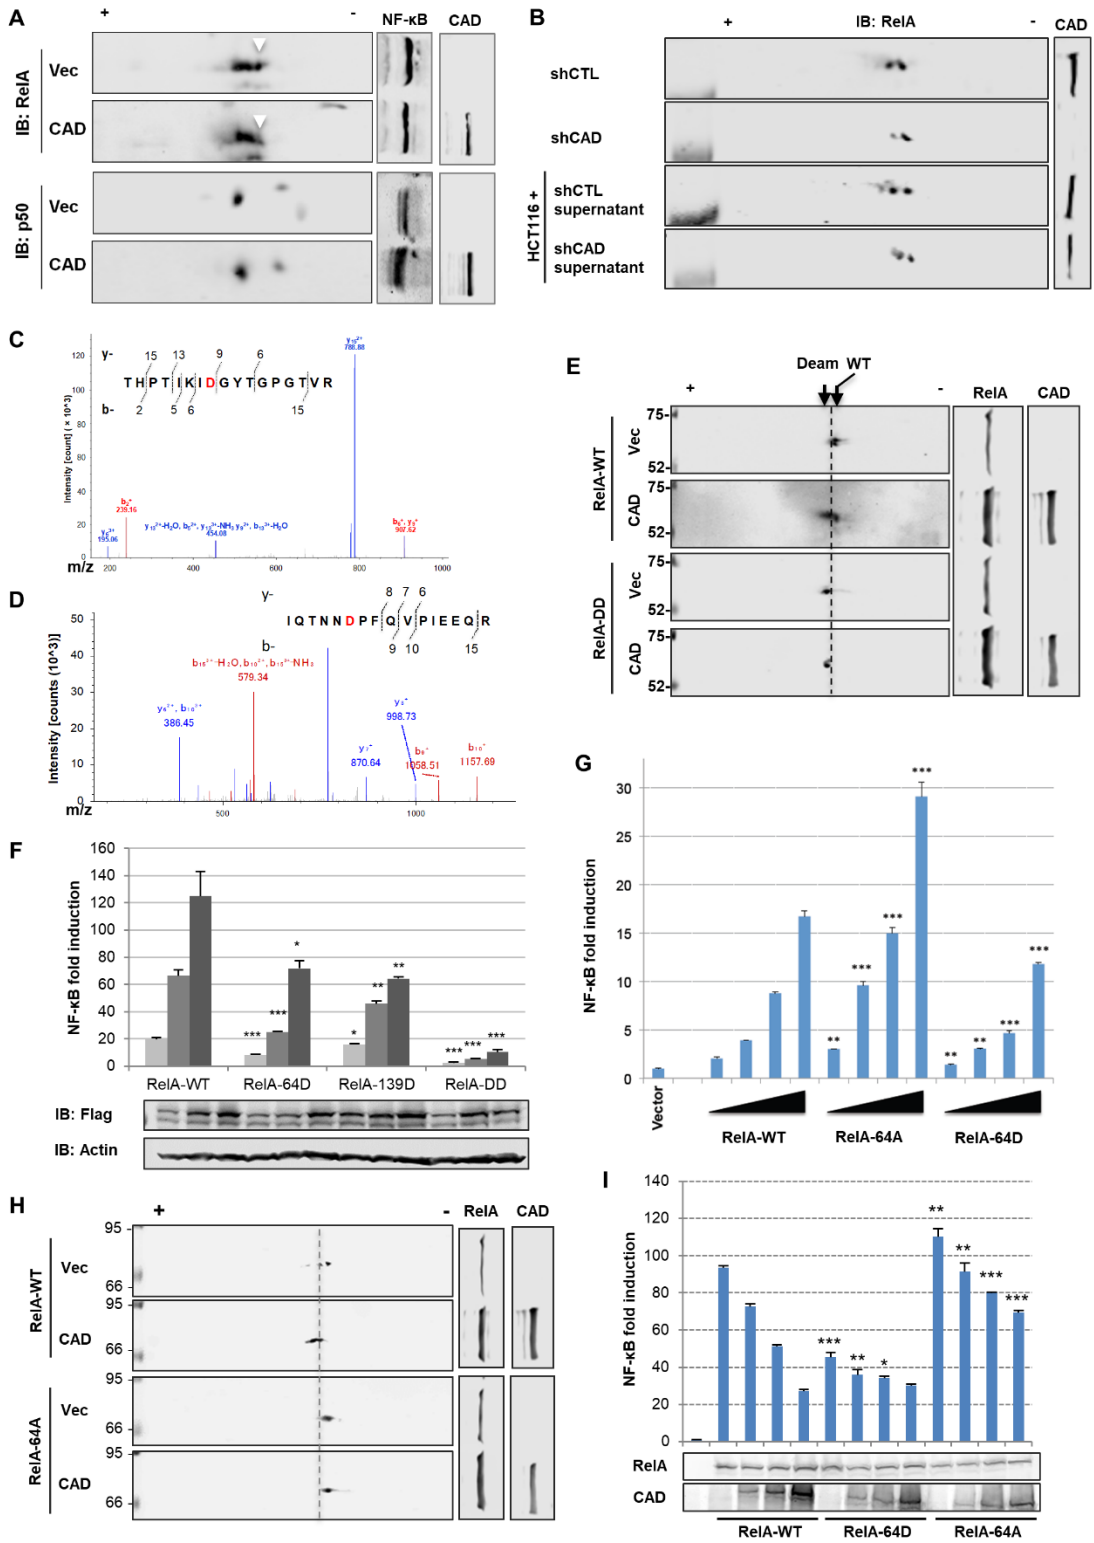

Figure S3, related to Figure 2. CAD Deamidates RelA to Inactivate NF- $\kappa$ B

(A) Immunoblots of whole cell lysates (WCLs) of HCT116 cells transfected with a plasmid containing CAD and after regular SDS-PAGE (right panels) or two-dimensional gel electrophoresis (2DGE) (left panels). Arrow denotes wild-type RelA species.

(B) Immunoblots of WCLs of HCT116 cells depleted for CAD or treated with the supernatant harvested from CAD-depleted HCT116 cells, after regular SDS-PAGE (right panels) or 2DGE (left panels) analysis.

(C and D) The m/z spectra of two peptides containing N64D (C) and N139D (D) are shown, with D highlighted in red due to deamidation, of the RelA purified from 293T cells transfected with a plasmid containing Flag-RelA with or without a plasmid containing CAD.

(E) Immunoblots of WCLs of 293T cells transfected with a plasmid containing wild-type RelA (RelA-WT) or deamidated RelA (RelA-DD) with or without CAD, after regular SDS-PAGE (right panels) or 2DGE (left panels) analysis.

(F) NF- $\kappa$ B luciferase reporter assay from 293T cells transfected with a plasmid containing wild-type RelA (RelA-WT), single deamidated RelA (RelA-64D and RelA-139D) or double-deamidated RelA (RelA-DD).

(G) NF- $\kappa$ B luciferase reporter assay from 293T cells transfected with a plasmid containing RelA-WT, deamidation-resistant RelA (RelA-64A) or RelA-64D.

(H) Immunoblots of WCLs of 293T cells transfected with a plasmid containing RelA-WT or RelA-64A with or without CAD, after regular SDS-PAGE (right panels) or 2DGE (left panels) analysis.

(I) NF- $\kappa$ B luciferase reporter assay from 293T cells transfected with a plasmid containing RelA-WT, RelA-N64D or RelA-64A with increasing amount of a plasmid containing CAD.

Data are presented as mean  $\pm$  SD. Significance was calculated using unpaired, two-tailed Student's *t*-test. \*\*,  $P < 0.01$ ; \*\*\*,  $P < 0.001$ ; NS, non-significant.

**Figure S4**

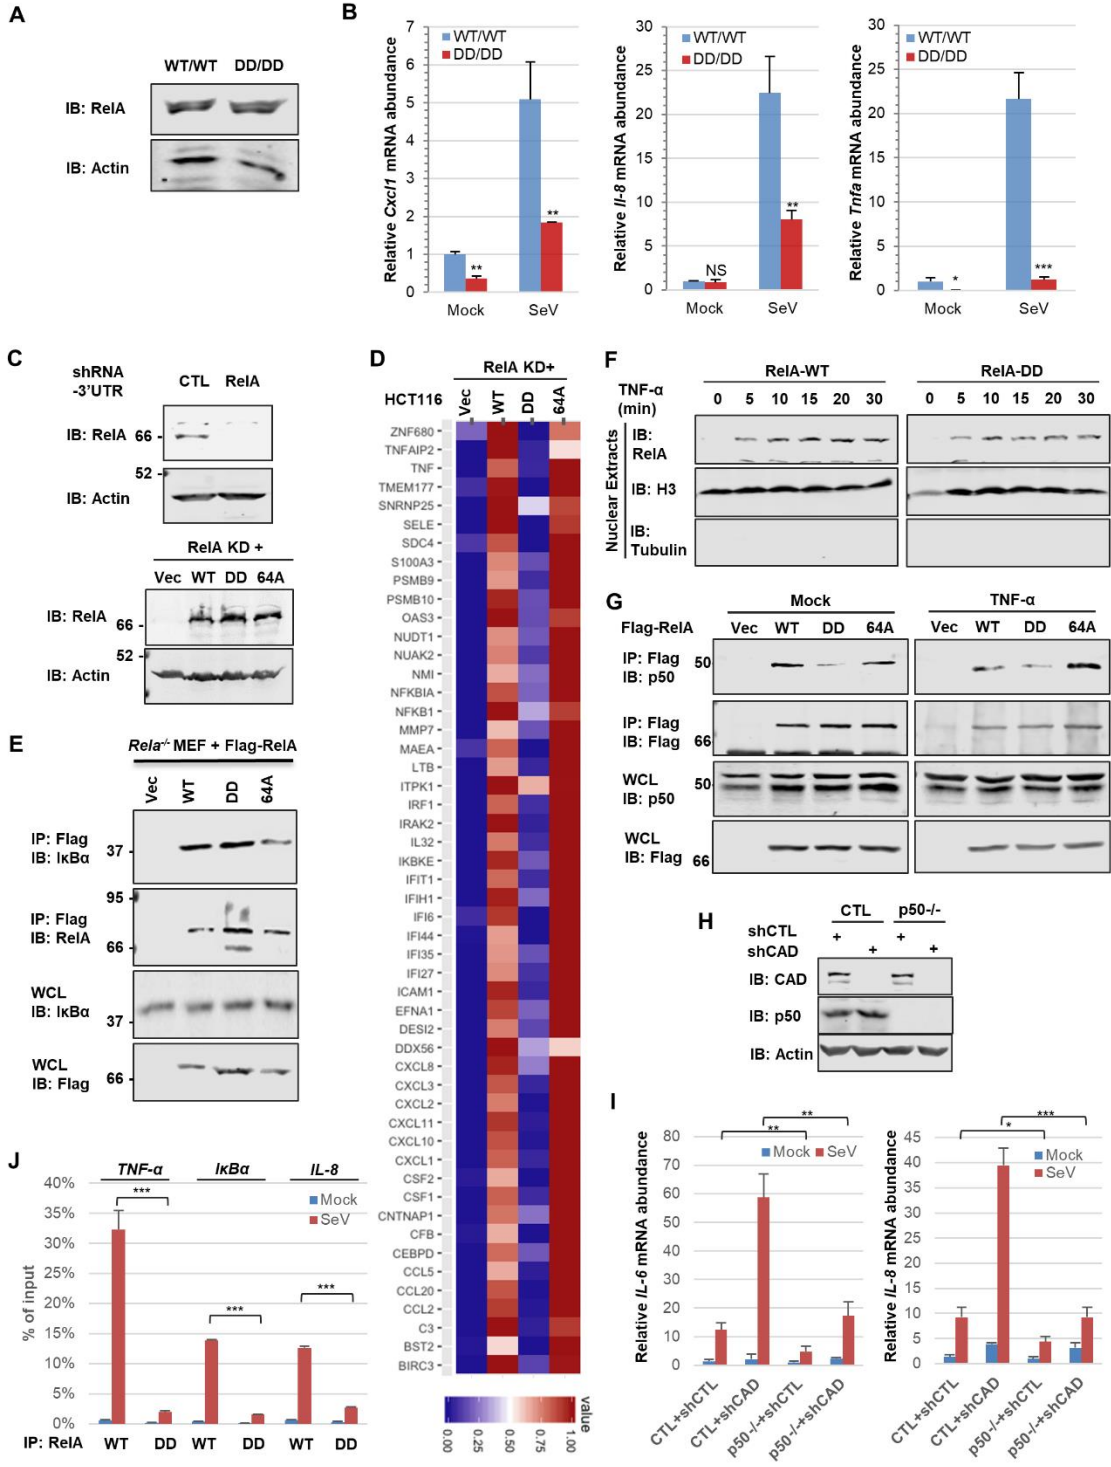



Figure S4, related to Figure 2. CAD Deamidates RelA to Inactivate NF- $\kappa$ B

(A) Immunoblots of whole cell lysates (WCLs) of mouse embryonic fibroblasts (MEFs) obtained at Day 14 from mouse embryos of wild-type and RelA-DD knock-in C57BL/6 mice.

(B) *Cxcl1*, *Il-8* and *Tnfa* abundance in MEFs as shown in (A) after infection with Sendai Virus (SeV).

(C) Immunoblots of WCLs of HCT116 cells depleted for endogenous RelA (top) and reconstituted with exogenous RelA-WT, RelA-DD or RelA-64A (bottom).

(D) A heatmap representing NF- $\kappa$ B-dependent gene expression from the RNA-sequencing analysis of reconstituted HCT116 cells as shown in (C).

(E) Immunoblots of WCLs of RelA-WT, RelA-DD or RelA-64A reconstituted *Rela*<sup>-/-</sup> MEFs precipitated with anti-Flag antibody.

(F) Immunoblots of the nuclear extract from *Rela*<sup>-/-</sup> MEFs reconstituted with RelA-WT and RelA-DD after treatment with mouse TNF- $\alpha$ .

(G) Immunoblots of WCLs of reconstituted HCT116 cells as described in (C) after treatment with TNF- $\alpha$  and precipitation with anti-Flag antibody.

(H) Immunoblots of WCLs of control (CTL) or p50-knockout 293T cells depleted for CAD.

(I) *IL-6* and *IL-8* abundance in control (CTL) or p50-knockout 293T cells depleted for CAD as shown in (H) after infection with SeV.

(J) Quantification of the promoter DNA from WCLs of reconstituted MEFs as shown in (E) after infection with SeV and precipitation with anti-Flag antibody.

Data are presented as mean  $\pm$  SD. Significance was calculated using unpaired, two-tailed Student's *t*-test. \*\*,  $P < 0.01$ ; \*\*\*,  $P < 0.001$ ; NS, non-significant.

**Figure S5**

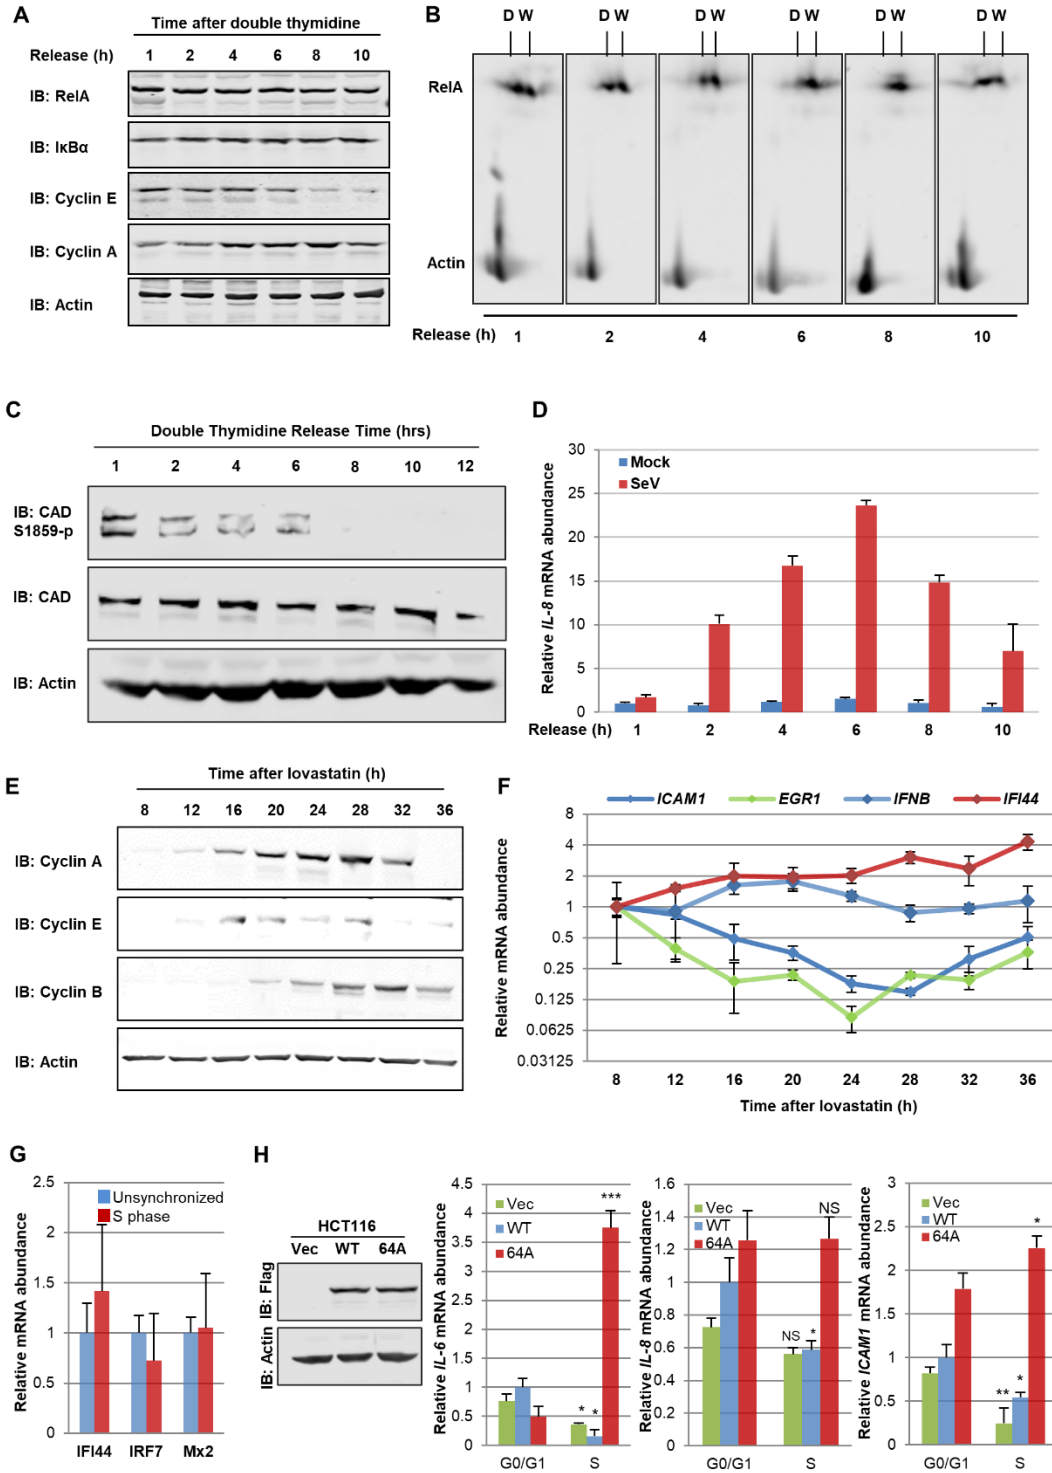

Figure S5, related to Figure 3. RelA Deamidation and NF- $\kappa$ B Downregulation is Cell Cycle-dependent

(A and B) Immunoblots of whole cell lysates (WCLs) from HCT116 cells released at indicated time points after double thymidine block analyzed by regular SDS-PAGE (A) or two-dimensional gel electrophoresis (2DGE) (B). D: deamidated; W: wild-type.

(C) Immunoblots of WCLs from HCT116 cells released at indicated time points after double thymidine block.

(D) *IL-8* abundance in HCT116 cells after infection with SeV at indicated time points upon double thymidine block release.

(E) Immunoblots of WCLs from BJ5 cells released at indicated time points after lovastatin arrest.

(F) The mRNA abundance of *ICAM1*, *EGR1*, *IFN- $\beta$*  and *IFI44* in human BJ5 foreskin fibroblasts at indicated time points as shown in (E).

(G) The mRNA abundance of *IFI44*, *IRF7* and *Mx2* in HCT116 cells without or with synchronization to S phase by double thymidine block.

(H) Immunoblots of WCLs from HCT116 cells stably expressing control, RelA-WT or RelA-64A (left panel). The mRNA abundance of *IL-6*, *IL-8* and *ICAM1* in HCT116 stable cells synchronized to G0/G1 and S phase by lovastatin arrest and double thymidine block, respectively (right panels).

Data are presented as mean  $\pm$  SD. Significance was calculated using unpaired, two-tailed Student's *t*-test. \*\*,  $P < 0.01$ ; \*\*\*,  $P < 0.001$ ; NS, non-significant.

**Figure S6**

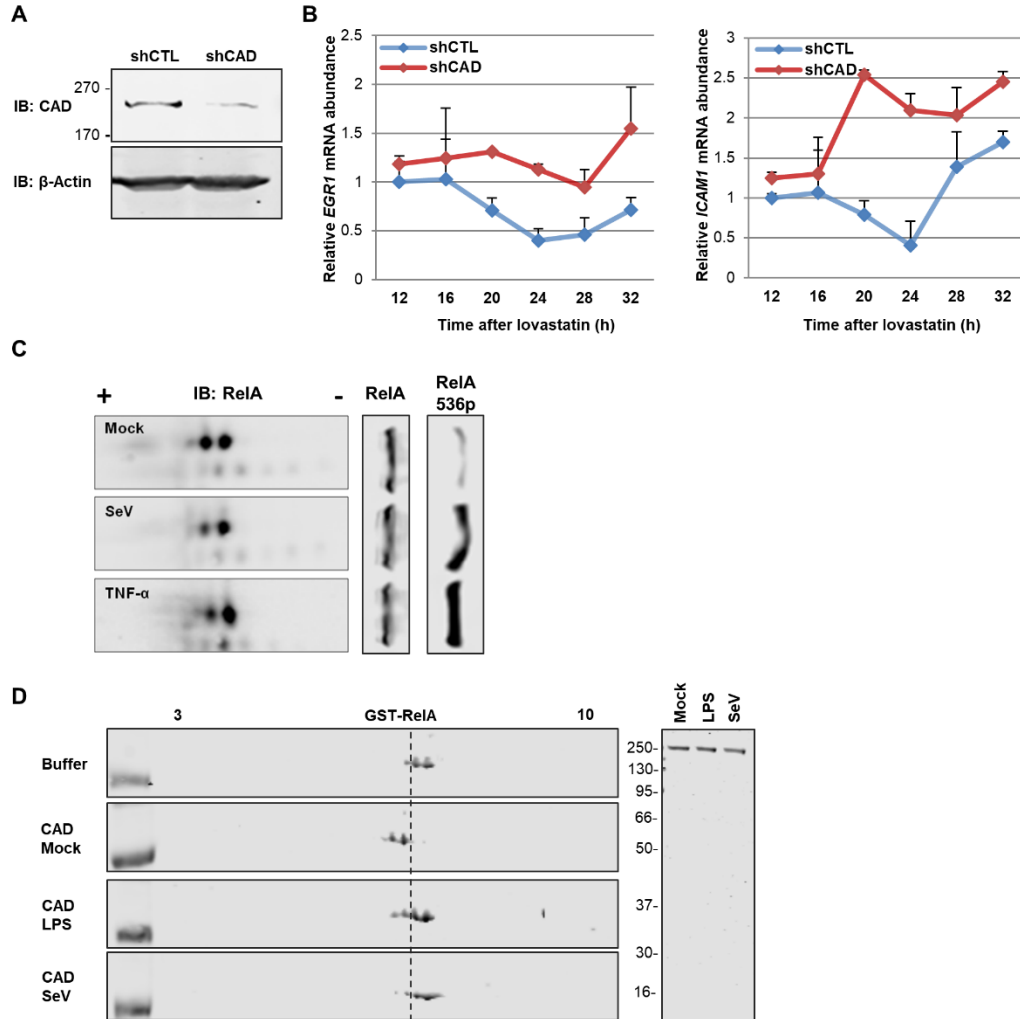

Figure S6, related to Figure 3. RelA Deamidation and NF- $\kappa$ B Downregulation is Cell Cycle-dependent

(A and B) Immunoblots of the whole cell lysates (WCLs) from HCT116 cells depleted for CAD (A). The mRNA abundance of *EGR1* and *ICAM1* in HCT116 stable cells released at indicated time points after lovastatin arrest (B).

(C) Immunoblots of the WCLs from HCT116 cells after infection with Sendai Virus (SeV) or treatment with TNF- $\alpha$  by regular SDS-PAGE and two-dimensional gel electrophoresis (2DGE) analysis.

(D) Immunoblots of in vitro deamidation reactions with GST-RelA and precipitated CAD from HCT116 Flag-CAD knockin cells that were mock-, LPS-treated or infected with SeV by 2DGE analysis (left panel). Silver stains of purified CAD (right panel).

Data are presented as mean  $\pm$  SD.

**Figure S7**

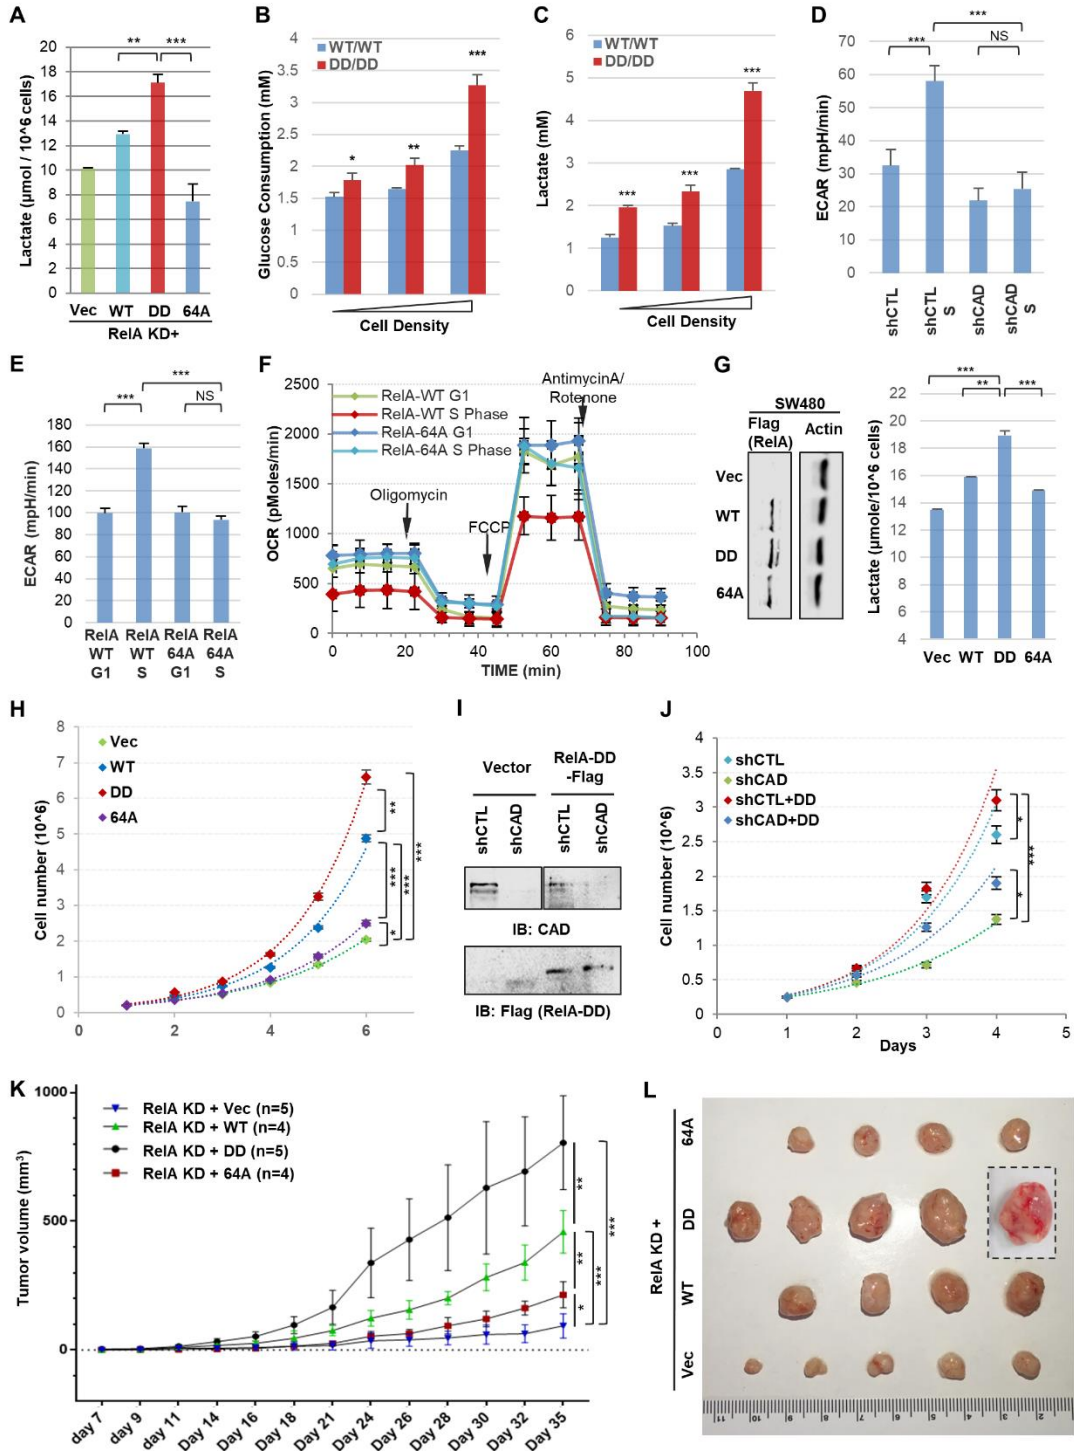

Figure S7, related to Figure 4. CAD-mediated RelA Deamidation is Crucial for Glycolysis and Cell Proliferation

(A) Lactate levels in the medium harvested from RelA-knockdown (RelA-KD) HCT116 cells reconstituted with control (vec), wild-type RelA (WT), RelA-DD (DD) and the deamidation-resistant RelA-64A (64A).

(B and C) Glucose consumption in the medium harvested from mouse embryonic fibroblasts (MEFs) of wild-type and RelA-DD knockin genotype (B). Lactate levels in the medium (C).

(D) Resting extracellular acidification rate (ECAR) of the non-synchronized or S phase synchronized HCT116 cells depleted for control or CAD.

(E) Resting ECAR of G1/S phase synchronized HCT116 cells stably expressing RelA-WT or RelA-64A.

(F) Oxygen consumption rate (OCR) of G1/S phase synchronized HCT116 cells stably expressing RelA-WT and RelA-64A.

(G) Immunoblots of WCLs from RelA-depleted SW480 cells reconstituted with RelA-WT, RelA-DD or RelA-64A (left panel), and lactate levels in the medium from reconstituted SW480 cells (right panel).

(H) Proliferation rate of reconstituted SW480 cells as shown in (G).

(I and J) Immunoblots of whole cell lysates (WCLs) from control or CAD-depleted HCT116 cells reconstituted with vector or RelA-DD (I), and proliferation rate of reconstituted HCT116 cells (J).

(K) Tumor growth in mice inoculated with reconstituted HCT116 as shown in (A).

(L) Tumors derived from reconstituted HCT116 cells. One of the tumors derived from HCT116 cells reconstituted with RelA-DD was harvested at day 30 due to ulceration.

Data are presented as mean  $\pm$  SD. Significance was calculated using unpaired (paired for Figure S7H, S7J and S7K), two-tailed Student's *t*-test. \*\*,  $P < 0.01$ ; \*\*\*,  $P < 0.001$ ; NS, non-significant.

**Figure S8**

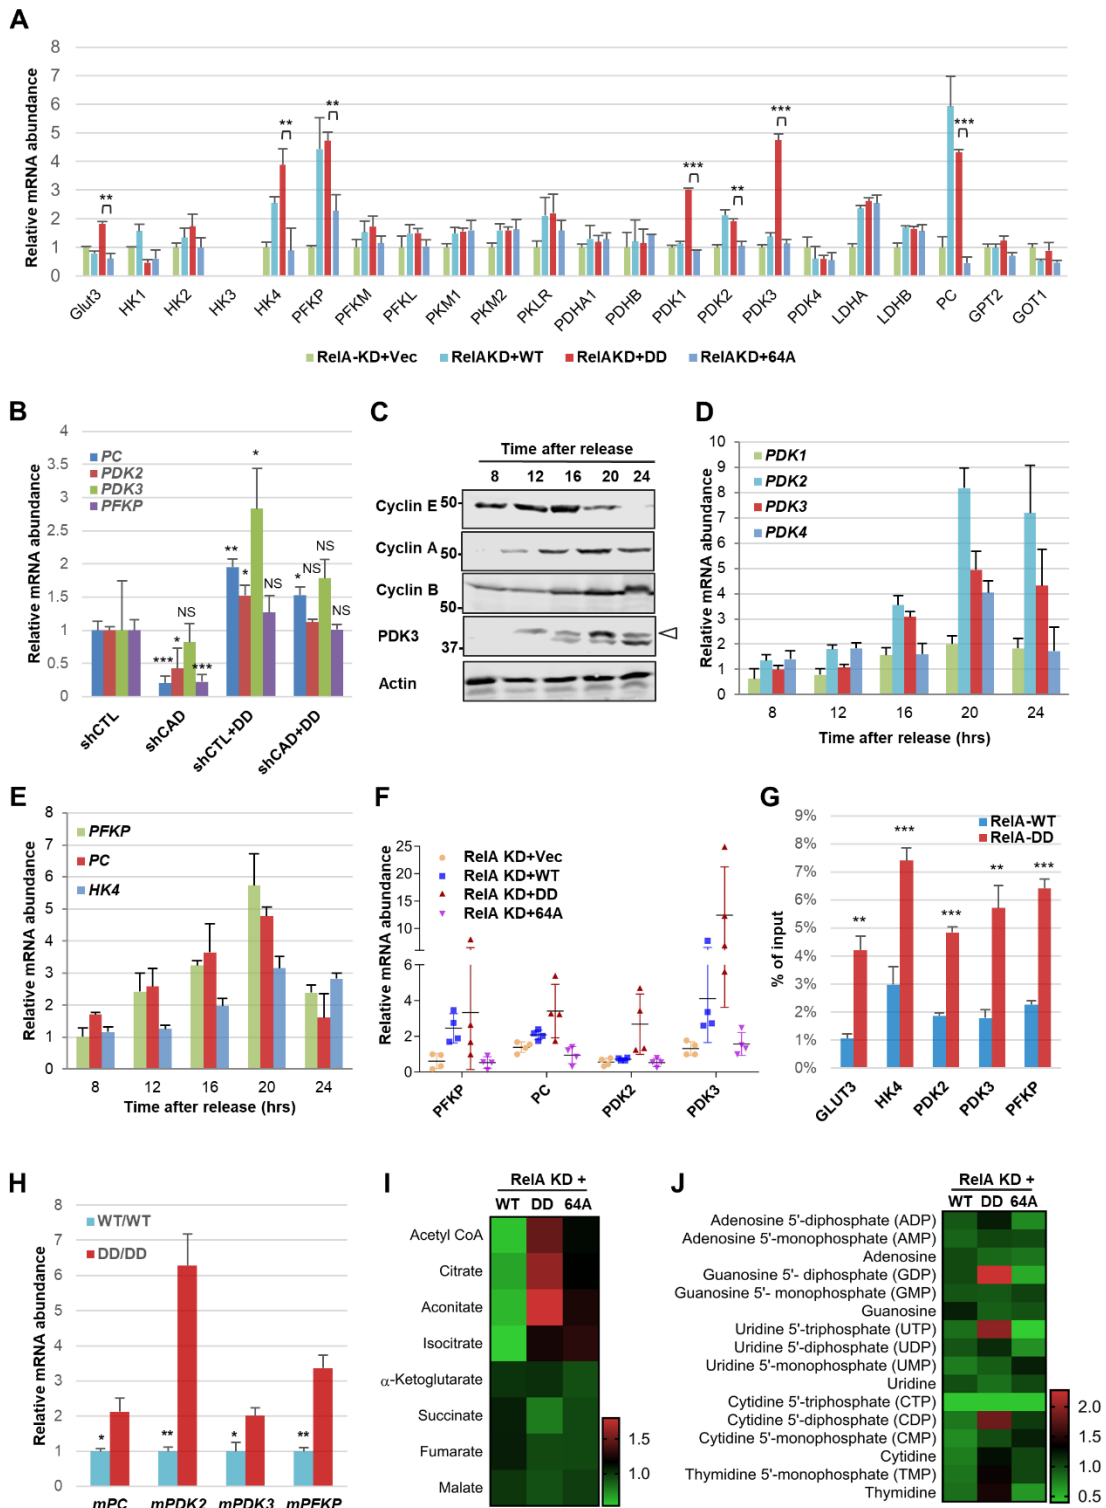

Figure S8, related to Figure 5. Metabolic Reprogramming by Deamidated RelA

(A) The mRNA abundance of glycolytic genes in reconstituted HCT116 cells.

(B) The mRNA abundance of *PC*, *PDK2*, *PDK3* and *PFKP* in control or CAD-depleted HCT116 cells reconstituted with vector or RelA-DD.

(C - E) Immunoblots of whole cell lysates (WCLs) of HCT116 cells at indicated time points released from lovastatin arrest (C). The mRNA abundance of *PDKs* and indicated glycolytic genes in HCT116 cells at indicated time points released from lovastatin arrest (D, E).

(F) The mRNA abundance of *PFKP*, *PC*, *PDK2* and *PDK3* in tumors derived from reconstituted HCT116 cells.

(G) Quantification of the promoter sequence of indicated genes in WCLs of reconstituted HCT116 cells precipitated with anti-Flag antibody.

(H) The mRNA abundance of *PFKP*, *PC*, *PDK2* and *PDK3* in mouse embryonic fibroblasts (MEFs) of wild-type and RelA-DD knock-in.

(I and J) A heatmap showing the intracellular concentration of metabolic intermediates of the TCA cycle (I) and nucleotide (J) analyzed by the metabolite profiling of reconstituted HCT116 cell lines.

Data are presented as mean  $\pm$  SD. Significance was calculated using unpaired, two-tailed Student's *t*-test. \*\*,  $P < 0.01$ ; \*\*\*,  $P < 0.001$ ; NS, non-significant.



Figure S9

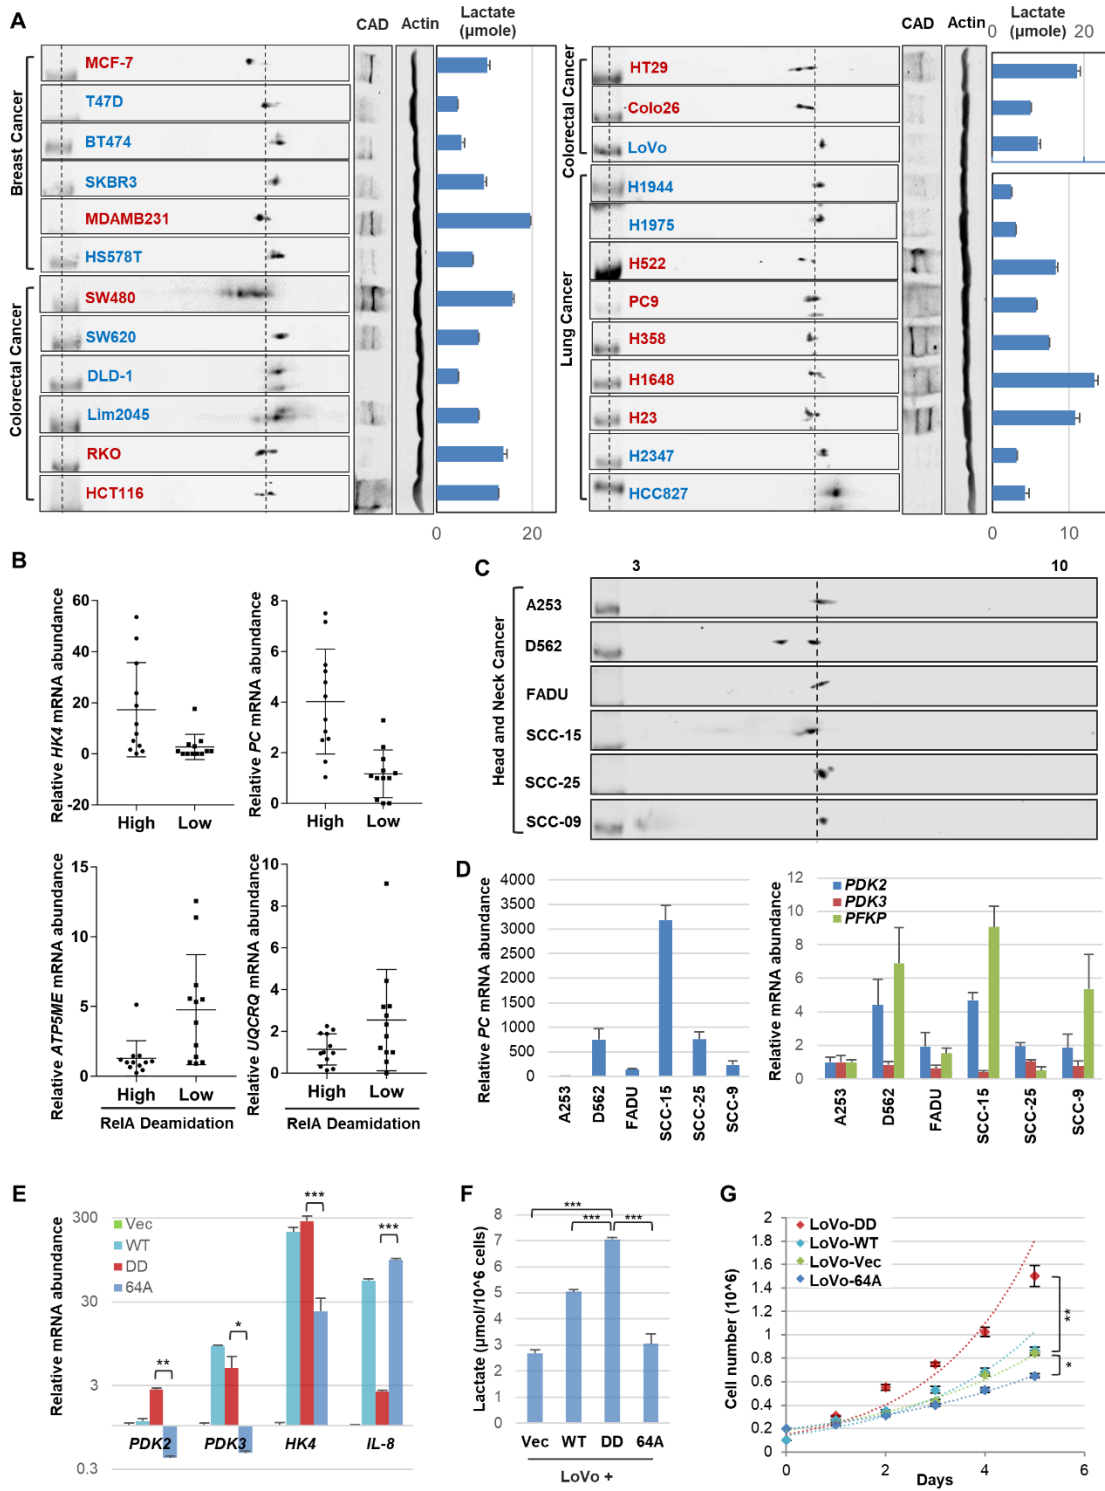

Figure S9, related to Figure 6. CAD-mediated RelA Deamidation is Crucial for Diverse Human Cancer Cells

(A) Immunoblots for RelA deamidation and CAD expression, and lactate production of twenty-four cancer cell lines of breast, colon and lung origin. These cell lines were then classified into high RelA deamidation (Red) and low or no RelA deamidation groups (Blue).

(B) The mRNA abundance of *HK4*, *PC*, *ATP5ME* and *UQCRQ* in the 24 cancer cell lines as described in (A) classified into high RelA deamidation and low or no RelA deamidation groups.

(C and D) Immunoblots of six human head and neck cancer cell lines for RelA deamidation analyzed by two-dimensional gel electrophoresis (C). The mRNA abundance of *PC*, *PDK2*, *PDK3* and *PFKP* in head and neck cancer cells (D).

(E - G) The mRNA abundance of *PDK2*, *PDK3*, *HK4* and *IL-8* in LoVo colorectal cancer cells reconstituted with wild-type RelA, RelA-DD and RelA-64A (E), and lactate levels in the medium (F) and proliferation rate (G) of reconstituted LoVo cells.

Data are presented as mean  $\pm$  SD. Significance was calculated using unpaired, two-tailed Student's *t*-test. \*\*,  $P < 0.01$ ; \*\*\*,  $P < 0.001$ ; NS, non-significant.

**Figure S10**

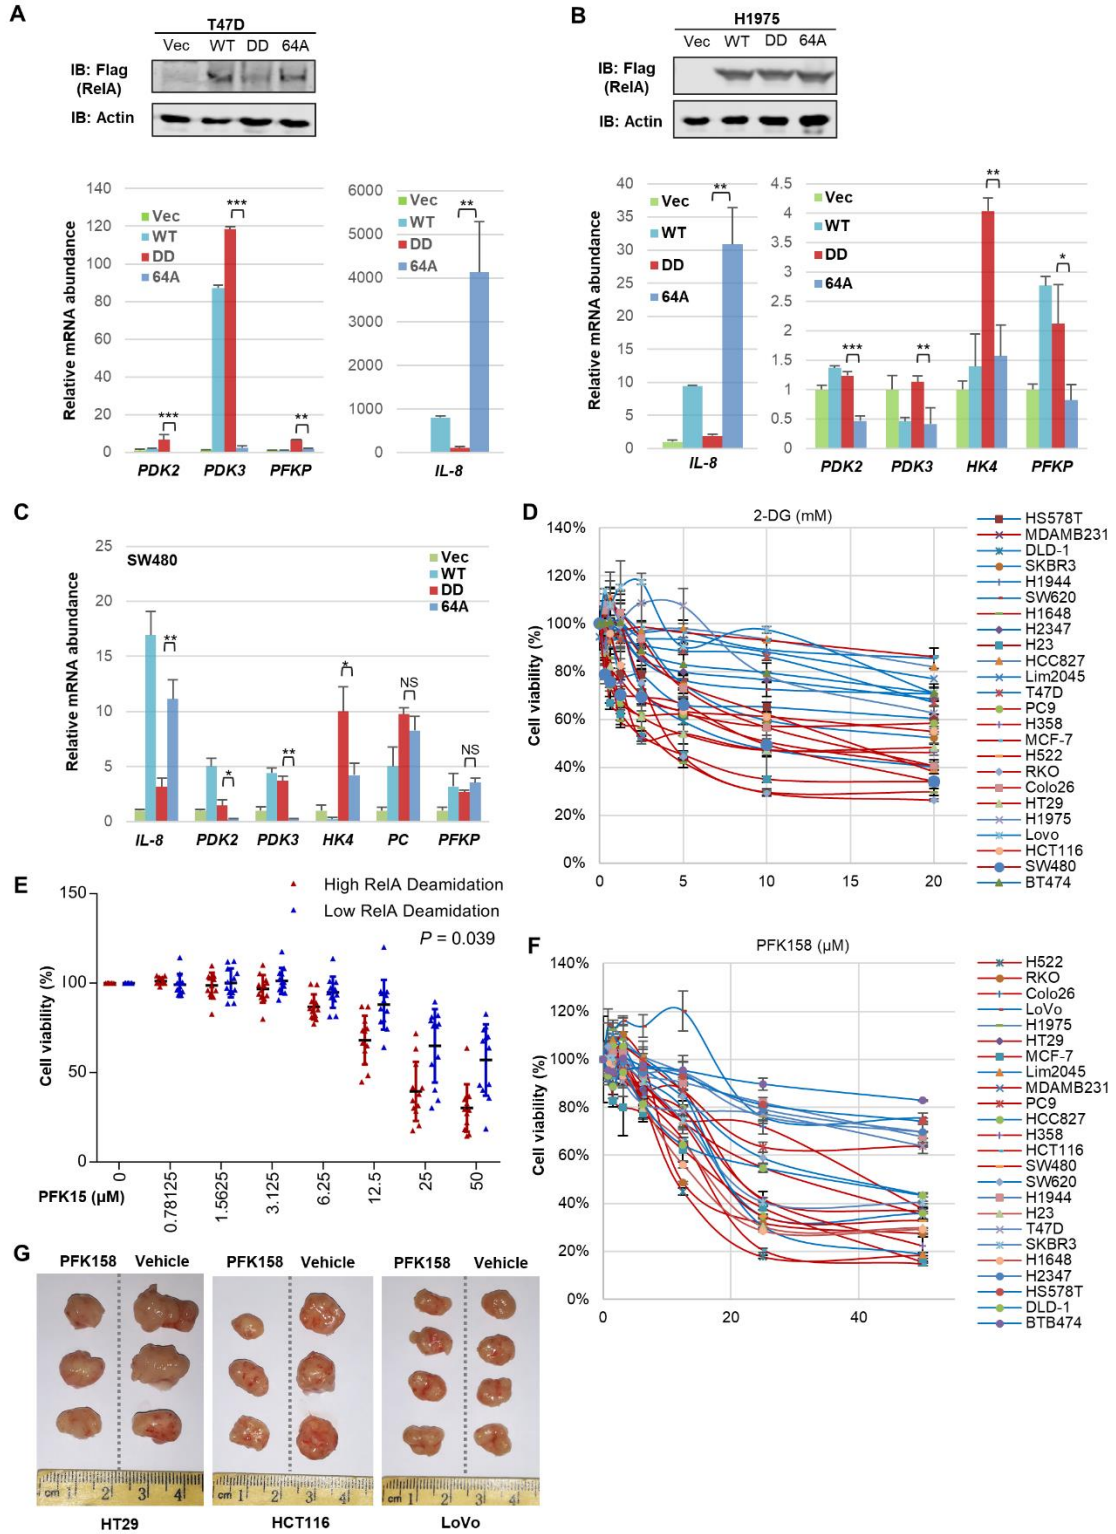

Figure S10, related to Figure 6. CAD-mediated RelA Deamidation is Crucial for Diverse Human Cancer Cells

(A) Immunoblots of whole cell lysates (WCLs) from T47D breast cancer cells reconstituted with wild-type RelA, RelA-DD and RelA-64A (top panel). The mRNA abundance of *PDK2*, *PDK3*, *PFKP* and *IL-8* in reconstituted T47D cells (bottom panel).

(B) Immunoblots of whole cell lysates (WCLs) from H1975 lung cancer cells reconstituted with wild-type RelA, RelA-DD and RelA-64A (top panel). The mRNA abundance of *IL-8*, *PDK2*, *PDK3*, *PFKP* and *HK4* in reconstituted H1975 cells (bottom panel).

(C) The mRNA abundance of *IL-8*, *PDK2*, *PDK3*, *HK4*, *PC* and *PFKP* in the SW480 cells depleted for endogenous RelA and reconstituted with wild-type RelA, RelA-DD and RelA-64A.

(D) Cell viability of 24 human cancer cell lines treated with 2-DG. Red and blue lines denote individual data point of cancer cell lines with high and low levels of RelA deamidation, respectively.

(E and F) Cell viability of the panel of 24 cancer cell lines treated with PFK-158 (a PFKFB3 inhibitor), plotted as the mean of a group (E) and individual cell line (F). Red: High deamidation cell lines. Blue: Low or no deamidation cell lines.

(G) Representative tumors derived from HT29, HCT116 and LoVo colorectal cancer cells in nude mice, treated with vehicle or PFK158 (25 mg/kg) (n = 6 for both treated groups).

Data are presented as mean  $\pm$  SD. Significance was calculated using unpaired (paired for Figure S10E), two-tailed Student's *t*-test. \*\*,  $P < 0.01$ ; \*\*\*,  $P < 0.001$ ; NS, non-significant.

TABLE S1, related to METHODS DETAILS

| Gene Name                             | Forward Primer                    | Reverse Primer                    |
|---------------------------------------|-----------------------------------|-----------------------------------|
| <b>Realtime PCR primers</b>           |                                   |                                   |
| <i>Human CAD</i>                      | 5'-TGCTCACCTATCCTCTGATCG-3'       | 5'-GCTGGGAGTAGGACAGCAC-3'         |
| <i>Human CCL2</i>                     | 5'-AAGATCTCAGTGCAGAGGCTCG-3'      | 5'-TTGCTTGTCCAGGTGGTCCAT-3'       |
| <i>Human EGR1</i>                     | 5'-CTCTCCAGCCTGCTCGTC-3'          | 5'-AGCAGCATCATCTCCTCCAG-3'        |
| <i>Human GOT1</i>                     | 5'-ACCTGGGAGAATCACAATGC-3'        | 5'-GCGGCTGTGCCCGCCGGTGC-3'        |
| <i>Human GOT2</i>                     | 5'-CAATGGCTGCAAGAAGTAA-3'         | 5'-GGCTTTAGCCCTGTGAAACA-3'        |
| <i>Human GPT2</i>                     | 5'-GGAGCTAGTGACGGCATTCTACGA-3'    | 5'-CCCAGGGTTGATTATGCAGAGCA-3'     |
| <i>Human HK1</i>                      | 5'-GGTCAAATCGTCCGCAAC-3'          | 5'-CCCGGGTCTT CATCGTC-3'          |
| <i>Human HK2</i>                      | 5'-CGGCCGTGCTACAATAGG-3'          | 5'-CTCGGGATCATGTG AGGG-3'         |
| <i>Human ICAM-1</i>                   | 5'-GGCCGGCCAGCTTATACAC-3'         | 5'-TAGACACTTGAGCTCGGGCA-3'        |
| <i>Human IFI44</i>                    | 5'-CCACCGAGATGTCAGAAAGAG -3'      | 5'-TGGTACATGTGGCTTTGCTC -3'       |
| <i>Human IFNB</i>                     | 5'-AGGACAGGATGAACTTTGAC-3'        | 5'-TGATAGACATTAGCCAGGAG-3'        |
| <i>Human IL-6</i>                     | 5'-CCAGCTATGAACTCCTTCTC - 3'      | 5'-GCTTGTTCCTCACATCTCTC - 3'      |
| <i>Human IL-8</i>                     | 5'-GGCACAACTTTTCAGAGACAG-3'       | 5'-ACACAGAGCTGCAGAAATCAGG-3'      |
| <i>Human IRF7</i>                     | 5'-TGCAAGGTGTACTGGGAG-3'          | 5'-TCAAGCTTCTGCTCCAGCTCCATAAG-3'  |
| <i>Human LDHA</i>                     | 5'-AGCCCGATTCCGTTACCT-3'          | 5'-CACCAGCAACATTCATTCCA-3'        |
| <i>Human LDHB</i>                     | 5'-TTGTGGTTTCCAACCCAGTGGACA-3'    | 5'-AAAATCCATCCATGGCAGCTGCTG-3'    |
| <i>Human MX2</i>                      | 5'-AGAAATTACATTCTTTCAAACACATCC-3' | 5'-GATCTCAAATGTCTTGTAGTTGACAAA-3' |
| <i>Human PDK1</i>                     | 5'-CCGCTCTCCATGAAGCAGTT-3'        | 5'-TTGCCGCAGAAACATAAATGAG-3'      |
| <i>Human PDK2</i>                     | 5'-CCGCTGTCCATGAAGCAGTT-3'        | 5'-TGCCTGAGGAAGGTGAAGGA-3'        |
| <i>Human PDK3</i>                     | 5'-CAAGCAGATCGAGCGCTACTC-3'       | 5'-CGAAGTCCAGGAATTGTTTGATG-3'     |
| <i>Human PDK4</i>                     | 5'-CCCGAGAGGTGGAGCATT-3'          | 5'-GCATTTTCTGAACCAAAGTCCAGTA-3'   |
| <i>Human PFKP</i>                     | 5'-CGGAAGTTCCTGGAGCACCTCTC-3'     | 5'-AAGTACACCTTGCCCCCACGTA-3'      |
| <i>Human PKM1</i>                     | 5'-CTATCCTCTGGAGGCTGTGC-3'        | 5'-CCATGAGGTCTGTGGAGTGA-3'        |
| <i>Human PKM2</i>                     | 5'-CCACTTGCAATTATTTGAGGA A-3'     | 5'-GTGAGCAGACCTGCCAGACT-3'        |
| <i>Human PC</i>                       | 5'-ACCAACTGCCGTGATGCTGA-3'        | 5'-ACACACGGATGGCAATCTCACC-3'      |
| <i>Human TNF-<math>\alpha</math></i>  | 5'-AGG CGC TCC CCA AGA AGA CA-3'  | 5'-TCC TTG GCA AAA CTG CAC CT-3'  |
| <i>Human <math>\beta</math>-actin</i> | 5'-CTGGCACCCAGCACAATG-3'          | 5'-GCCGATCCACACGGAGTACT-3'        |
| <i>Mouse Ccl-5</i>                    | 5'-CCTGCTGCTTTGCTACCTCTC-3'       | 5'-ACACACTTGCGGTTTCTTCGA-3'       |
| <i>Mouse Mip2</i>                     | 5'-CTCTCAAGGGCGGTCAAAAAGTT-3'     | 5'-TCAGACAGCGAGGCACATCAGGTA-3'    |
| <i>Mouse <math>\beta</math>-actin</i> | 5'-ACGGCCAGGTCATCACTATTG-3'       | 5'-CAAGAAGGAAGGCTGGAAAAGA-3'      |
| <i>Human DDX60</i>                    | 5'-AAGGTGTTCTTGATGATCTCC-3'       | 5'-TGACAATGGGAGTTGATATTCC-3'      |
| <i>Human Glut3</i>                    | 5'-CAGCGAGACCCAGAGATG-3'          | 5'-TTGGAAAGAGCCGATTGTAG-3'        |
| <i>Human HK3</i>                      | 5'-CTCCAGGCTGGTGTCAAGTGA-3'       | 5'-CTCCGATTGCAAAAAGGTGACT-3'      |
| <i>Human HK4</i>                      | 5'-GCTTGTGATTCTGGGATGGA-3'        | 5'-GCTATGGGAGCTGAAGATGTAG-3'      |
| <i>Human PFKM</i>                     | 5'-GAGTGACTTGTGAGTGACCTCCAGAAA-3' | 5'-CACAATGTTCAAGGTAGCTGGACTTCG-3' |
| <i>Human PFKL</i>                     | 5'-GGCATTATGTGGGTGCC AAAGTC-3'    | 5'-CAGTTGGCCTGCTTGTGTTCTCA-3'     |
| <i>Human PKLR</i>                     | 5'-GAAAGGCCCAAGGTATCCAA-3'        | 5'-GCAGAGTGAGGGTGGTAAAG-3'        |
| <i>Human PDHA1</i>                    | 5'-GTTACCACGGACACAGTATGAG-3'      | 5'-CATCCTGTCCTTGAGAAGCATAA-3'     |
| <i>Human PDHB</i>                     | 5'-GGAGTAGGAGCTGAAATCTGTG-3'      | 5'-GCATAAGGCATAGGGACATCA-3'       |
| <i>Human PC</i>                       | 5'-GATAGTGTCTGCCTTCTGGAGAGC-3'    | 5'-ACACACGGATGGCAATCTCACC-3'      |
| <i>Human GPT</i>                      | GGAGCTAGTGACGGCATTCTACGA-3'       | 5'-CCCAGGGTTGATTATGCAGAGCA-3'     |
| <i>Human ATP5ME</i>                   | 5'-GAGAAGGCACCGTCGATGG-3'         | 5'-ACACTCTGAATAGCTGTAGGGAT-3'     |
| <i>Human UQCQRQ</i>                   | 5'-TGGTGGAGTCTTGCACTAAAG-3'       | 5'-CTCCTGGCACAGAAACAGAA-3'        |
| <b>ChIP-PCR primers</b>               |                                   |                                   |
| <i>Human TNF-<math>\alpha</math></i>  | 5'-GATTCCTTGATGCCTGGGTGTC-3'      | 5'-GAGCTTCTGCTGGCTGGCTGT-3'       |
| <i>Human Ikb<math>\alpha</math></i>   | 5'-GCTTCTCAGTGGAGGACGAG-3'        | 5'-CTGGCAGGGGATTTCTCAG-3'         |

TABLE S1, related to METHODS DETAILS

|                                       |                               |                              |
|---------------------------------------|-------------------------------|------------------------------|
| <i>Human IL-8</i>                     | 5'-GTGTGATGACTCAGGTTTGCCC-3'  | 5'-GTGTGATGACTCAGGTTTGCCC-3' |
| <i>Human GLUT3</i>                    | 5'-CCCCTGAAGCAATCTTGTGATC-3'  | 5'-AAAAACCCAGGGTGGAGAGAG-3'  |
| <i>Human HK4</i>                      | 5'-AACTTTGGTGTGACCCCTTAC-3'   | 5'-CCAAAGCATCTACCTCTTAGC-3'  |
| <i>Human PDK2</i>                     | 5'-CCGGAGTTGTTTGTGAGTGG-3'    | 5'-GCCTCCTCCCTACCCTTG-3'     |
| <i>Human PDK3</i>                     | 5'-CCGGACAAAACACAAACGTC-3'    | 5'-CAGCAGCAGCTCCAGGAC-3'     |
| <i>Human PFKP</i>                     | 5'-TCATCTCTAGAGCCCCAAC-3'     | 5'-GTGTGGGCAGGAGCATCTAC-3'   |
| sgRNA                                 |                               |                              |
| <i>Human CAD</i>                      | 5'-ACCTGTCTTTGGGATCTGCCTGG-3' | Exon 6                       |
| <i>Human CAD</i>                      | 5'-GAACGGCATGTACATCCGCATGG-3' | Exon 43                      |
| <i>Human NF-<math>\kappa</math>B1</i> | 5'-TGTGAAGGCCCATCCCATGGTGG-3' | Exon 5                       |
